# Supplementary material for: Chrononutrition during Pregnancy and Its Association with Maternal and Offspring Outcomes: A Systematic Review and Meta-Analysis of Ramadan and Non-Ramadan Studies
Source: MDPI journal article supplement (doi:10.3390/nu15030756), 2023-02-02
Supplement: s1 [file s1]

**Supplementary Table S1. Search strategy for the databases**

**Supplementary Table S2. Risk of bias assessment\_MMAT**

**Supplementary Table S3. Characteristics of studies on Ramadan fasting in relation to maternal and birth outcomes.**

**Supplementary Table S1. Search strategy for the databases**

| Databases | Populations                                                                                                                                                                                                                                                                                                                                                                                                                             | Interventions                                                                                                                                                                                                                                                                                                                                                                                                                                                                                                                                                                                                                                                                                                                                                                                                                                                                                                                          |
|-----------|-----------------------------------------------------------------------------------------------------------------------------------------------------------------------------------------------------------------------------------------------------------------------------------------------------------------------------------------------------------------------------------------------------------------------------------------|----------------------------------------------------------------------------------------------------------------------------------------------------------------------------------------------------------------------------------------------------------------------------------------------------------------------------------------------------------------------------------------------------------------------------------------------------------------------------------------------------------------------------------------------------------------------------------------------------------------------------------------------------------------------------------------------------------------------------------------------------------------------------------------------------------------------------------------------------------------------------------------------------------------------------------------|
| PubMed    | (Pregnancy [tw] OR Pregnant [tw] OR Gravidity [tw] OR Gestation [tw] OR Antenatal [tw] OR Preconception OR Pregnancy [mh] OR Postpartum [tw] OR Postnatal [tw] OR Mother [tw] OR Maternal OR Mother [mh])                                                                                                                                                                                                                               | (Chrononutrition [tw] OR Intermittent fasting [tw] OR Maternal fasting [tw] OR Meal timing [tw] OR Meal frequency [tw] OR Meal skipping [tw] OR Eating time [tw] OR Breakfast skipping [tw] OR Lunch skipping [tw] OR Dinner skipping [tw] OR Night-time eating [tw] OR Time-restricted eating [tw] OR Diet timetable [tw] OR Food timetable [tw] OR Time-restricted feeding [tw] OR Ramadan fasting [tw] OR Muslim fasting [tw] OR Regular eating [tw] OR Eating rate [tw] OR Temporal eating [tw] OR Diurnal eating [tw] OR Nocturnal eating [tw] OR Night eating [tw] OR Delayed meal [tw] OR Circadian eating [tw] OR Meal pattern [tw] OR Eating episode [tw])                                                                                                                                                                                                                                                                    |
| Embase    | ('pregnancy'/exp OR pregnancy OR 'child bearing' OR 'childbearing' OR 'gestation' OR 'gravidity' OR 'intrauterine pregnancy' OR 'labor presentation' OR 'labour presentation' OR 'pregnancy' OR 'pregnancy maintenance' OR 'pregnancy trimesters' OR pregnant OR antenatal OR preconception OR postpartum OR postnatal OR 'mother'/exp OR mother OR 'mother' OR 'motherhood' OR 'mothering' OR 'mothers' OR 'maternal'/exp OR maternal) | ('chrononutrition'/exp OR chrononutrition OR 'intermittent fasting'/exp OR 'intermittent fasting' OR 'maternal fasting' OR 'meal timing' OR 'meal frequency'/exp OR 'meal frequency' OR 'meal skipping'/exp OR 'meal skipping' OR 'skipping a meal' OR 'skipping meals' OR 'eating time' OR 'breakfast skipping'/exp OR 'breakfast skipping' OR 'skipping breakfast' OR 'lunch skipping' OR 'dinner skipping' OR 'night-time eating' OR 'time restricted eating'/exp OR 'time restricted eating' OR 'diet timetable' OR 'food timetable' OR 'time restricted feeding'/exp OR 'time restricted feeding' OR 'ramadan fasting'/exp OR 'islamic fast' OR 'islamic fasting' OR 'muslim fasting' OR 'ramadan fast' OR 'ramadan fasting' OR 'regular eating' OR 'eating rate' OR 'temporal eating' OR 'diurnal eating' OR 'nocturnal eating' OR 'night eating' OR 'delayed meal' OR 'circadian eating' OR 'meal pattern' OR 'eating episode') |

## Supplementary Table S2. Risk of bias assessment\_MMAT

### Quantitative non-randomized studies

| Authors, publication date   | Are the participants representative of the target population? | Are measurements appropriate regarding both the outcome and intervention (or exposure)? | Are there complete outcome data? | Are the confounders accounted for in the design and analysis? | During the study period, is the intervention administered (or exposure occurred) as intended? |
|-----------------------------|---------------------------------------------------------------|-----------------------------------------------------------------------------------------|----------------------------------|---------------------------------------------------------------|-----------------------------------------------------------------------------------------------|
| Parveen et al., 2020        | Yes                                                           | Yes                                                                                     | Yes                              | No                                                            | Yes                                                                                           |
| Savitri et al., 2018        | Yes                                                           | Yes                                                                                     | Yes                              | Yes                                                           | Yes                                                                                           |
| Safari et al., 2019         | No                                                            | No                                                                                      | No                               | Yes                                                           | No                                                                                            |
| Engin-Ustun et al., 2016    | Yes                                                           | Yes                                                                                     | Yes                              | Yes                                                           | Yes                                                                                           |
| AlMogbel et al., 2022       | Yes                                                           | Yes                                                                                     | Yes                              | Yes                                                           | Yes                                                                                           |
| Hossain et al., 2021        | Yes                                                           | Yes                                                                                     | Yes                              | No                                                            | Yes                                                                                           |
| Gul et al., 2018            | Yes                                                           | Yes                                                                                     | No                               | No                                                            | Yes                                                                                           |
| Sakar et al., 2016          | Yes                                                           | Yes                                                                                     | Yes                              | No                                                            | No                                                                                            |
| Baynouna et al., 2014       | Yes                                                           | Yes                                                                                     | No                               | No                                                            | Yes                                                                                           |
| Sakar et al., 2015          | Yes                                                           | Yes                                                                                     | Yes                              | No                                                            | Yes                                                                                           |
| Hassanein et al., 2021      | Yes                                                           | Yes                                                                                     | Yes                              | No                                                            | Yes                                                                                           |
| Moradi., 2011               | Yes                                                           | Yes                                                                                     | Yes                              | No                                                            | Yes                                                                                           |
| Abd-Allah Rezk et al., 2016 | Yes                                                           | No                                                                                      | Yes                              | No                                                            | Yes                                                                                           |
| Makvandi et al., 2019       | Yes                                                           | Yes                                                                                     | Yes                              | No                                                            | Yes                                                                                           |
| Seckin et al., 2014         | Yes                                                           | Yes                                                                                     | Yes                              | No                                                            | Yes                                                                                           |
| Savitri et al., 2014        | Yes                                                           | Yes                                                                                     | Yes                              | Yes                                                           | Yes                                                                                           |
| Awad et al., 2012           | Yes                                                           | Yes                                                                                     | Yes                              | Yes                                                           | Yes                                                                                           |
| Gur et al., 2015            | Yes                                                           | Yes                                                                                     | Yes                              | Yes                                                           | Yes                                                                                           |
| Hizli et al., 2012          | Yes                                                           | No                                                                                      | Yes                              | No                                                            | Yes                                                                                           |
| Khoshdel et al., 2014       | Yes                                                           | Yes                                                                                     | Yes                              | Yes                                                           | Yes                                                                                           |
| Ozturk et al., 2011         | Yes                                                           | Yes                                                                                     | Yes                              | Yes                                                           | Yes                                                                                           |
| Ziaee et al., 2010          | Yes                                                           | No                                                                                      | No                               | No                                                            | Yes                                                                                           |

|                             |     |     |     |     |     |
|-----------------------------|-----|-----|-----|-----|-----|
| Khoshdel et al., 2014       | Yes | No  | No  | No  | Yes |
| Petherick et al., 2014      | Yes | Yes | Yes | Yes | Yes |
| Kavehmanesh et al., 2004    | Yes | Yes | Yes | No  | Yes |
| Karateke et al., 2015       | Yes | Yes | Yes | Yes | Yes |
| Bayoglu Tekin et al., 2016  | Yes | Yes | Yes | Yes | No  |
| Mirghani et al., 2004       | Yes | Yes | Yes | No  | No  |
| Afandi et al., 2017         | Yes | Yes | Yes | No  | No  |
| Mirghani., 2005             | Yes | Yes | No  | No  | No  |
| Malhotra et al., 1989       | Yes | Yes | Yes | Yes | Yes |
| Mirghani et al., 2007       | Yes | Yes | Yes | No  | No  |
| Kiziltan et al., 2005       | Yes | Yes | Yes | Yes | Yes |
| Khalaf et al., 2015         | Yes | No  | No  | No  | No  |
| Azizi et al., 2004          | Yes | Yes | Yes | Yes | Yes |
| Kamyabi et al., 2004        | Yes | Yes | Yes | No  | Yes |
| Ismail et al., 2011         | Yes | Yes | Yes | Yes | Yes |
| Dikensoy et al., 2009       | Yes | No  | Yes | No  | No  |
| Rakicioğlu et al., 2006     | Yes | No  | Yes | Yes | Yes |
| Mirghani et al., 2006       | Yes | No  | Yes | No  | No  |
| Mirghani et al., 2003       | Yes | Yes | Yes | No  | No  |
| Hernández-Díaz et al., 2014 | Yes | Yes | Yes | Yes | Yes |
| Nulty et al., 2021          | Yes | No  | Yes | Yes | Yes |
| Shiraishi et al., 2019      | Yes | No  | Yes | No  | Yes |
| Shemsu et al., 2020         | Yes | No  | Yes | No  | Yes |
| Celik et al., 2018          | Yes | Yes | Yes | Yes | No  |
| Fite et al., 2022           | No  | Yes | Yes | No  | Yes |
| Loy et al., 2019            | Yes | Yes | Yes | Yes | Yes |
| Loy et al., 2017            | Yes | Yes | Yes | Yes | Yes |

|                             |     |     |     |     |     |
|-----------------------------|-----|-----|-----|-----|-----|
| Dong et al., 2020           | Yes | Yes | Yes | Yes | Yes |
| Salunkhe et al., 2018       | Yes | Yes | Yes | No  | Yes |
| Kedir et al., 2021          | Yes | Yes | Yes | Yes | Yes |
| Debella et al., 2021        | Yes | Yes | Yes | Yes | Yes |
| Grum et al., 2018           | Yes | Yes | Yes | Yes | Yes |
| Abriha et al., 2014         | Yes | Yes | Yes | Yes | Yes |
| Gebre et al., 2015          | Yes | Yes | No  | Yes | Yes |
| Englund-Ögge et al., 2017   | Yes | Yes | Yes | Yes | Yes |
| Ainscough et al., 2020      | Yes | Yes | Yes | Yes | Yes |
| Loy et al., 2020            | Yes | Yes | Yes | Yes | Yes |
| Loy et al., 2016            | Yes | Yes | Yes | Yes | Yes |
| Gontijo et al., 2020        | Yes | Yes | Yes | Yes | Yes |
| Deniz et al., 2019          | Yes | Yes | Yes | No  | Yes |
| Ku et al., 2022             | Yes | Yes | Yes | Yes | Yes |
| Wolynczyk-Gmaj et al., 2017 | Yes | Yes | Yes | Yes | Yes |
| Tug et al., 2011            | Yes | Yes | Yes | Yes | Yes |
| Abd-El-Aal et al., 2019     | Yes | No  | Yes | Yes | Yes |

#### Randomized controlled clinical trial

| Authors, publication date | Is randomization appropriately performed? | Are the groups comparable at baseline? | Are there complete outcome data? | Are outcome assessors blinded to the intervention provided? | Did the participants adhere to the assigned intervention? |
|---------------------------|-------------------------------------------|----------------------------------------|----------------------------------|-------------------------------------------------------------|-----------------------------------------------------------|
| Yong et al., 2022         | No                                        | Yes                                    | Yes                              | No                                                          | Yes                                                       |
| Messika et al., 2022      | Yes                                       | Yes                                    | Yes                              | Yes                                                         | Yes                                                       |

**Supplementary Table S3.** Characteristics of studies on Ramadan fasting in relation to maternal and birth outcomes.

| Authors, publication date     | Study design          | Population             | Number of Participants                                     | The period of Ramadan                                            | Duration of fasting per day (for Ramadan) | Participants' Age                                             | BMI                                                                              | Comparison of exposure                                              | Outcome                                                                                                                                        | Period of exposure assessment                                | Covariates                                                                                               | Main findings                                                                                             |
|-------------------------------|-----------------------|------------------------|------------------------------------------------------------|------------------------------------------------------------------|-------------------------------------------|---------------------------------------------------------------|----------------------------------------------------------------------------------|---------------------------------------------------------------------|------------------------------------------------------------------------------------------------------------------------------------------------|--------------------------------------------------------------|----------------------------------------------------------------------------------------------------------|-----------------------------------------------------------------------------------------------------------|
| Parveen (Pakistan, 2020) [1]  | Cross-sectional study | Healthy pregnant women | 226<br>1. Fasting >15 days: 58<br>2. Fasting <15 days: 168 | 5/5/2019-6/4/2019                                                | 15 hours                                  | 1. Fasting >15 days: 28.4<br>2. Fasting <15 days: 28.1 (Mean) | 1. Fasting >15 days: 25.7<br>2. Fasting <15 days: 25.9 (During pregnancy) (Mean) | Fasting >15 days vs. Fasting <15 days                               | Mode of delivery, GDM, pre-eclampsia, preterm birth, birth weight, birth height, head circumference, mid arm circumference, weight of placenta | 15-40 weeks of gestation                                     | na                                                                                                       | Fasting women were not found to have poor maternal and fetal outcomes when compared to not fasting women. |
| Savitri (Indonesia, 2018) [2] | Cohort study          | Pregnant women         | 139<br>1. Fasting ≥1 days: 110<br>2. Fasting = 0 days: 29  | 7/21/2012-8/18/2012<br>7/10/2013-8/7/2013<br>6/29/2014-7/27/2014 | 14.3 hours                                | 1. Fasting ≥1 days: 28.8<br>2. Fasting = 0 days: 27.4 (Mean)  | 1. Fasting ≥1 days: 22.6<br>2. Fasting = 0 days: 21.1 (Pre-pregnancy) (Median)   | Fasting during the first & second & third trimester vs. Not fasting | Birth weight                                                                                                                                   | 1-40 ↑ weeks of gestation (The first/second/third trimester) | Secondhand smoking exposure, family income categories, maternal education categories, pre-pregnancy BMI, | Maternal fasting did not seem to affect the birth weight of newborns.                                     |

|                                          |                       |                           |                                                                   |                         |          |                                                                           |                                                                                                                                                                                                                                      |                                          |                                                                                                                                                             |                                                          |                                                                                                          |                                                                                                                                        |
|------------------------------------------|-----------------------|---------------------------|-------------------------------------------------------------------|-------------------------|----------|---------------------------------------------------------------------------|--------------------------------------------------------------------------------------------------------------------------------------------------------------------------------------------------------------------------------------|------------------------------------------|-------------------------------------------------------------------------------------------------------------------------------------------------------------|----------------------------------------------------------|----------------------------------------------------------------------------------------------------------|----------------------------------------------------------------------------------------------------------------------------------------|
|                                          |                       |                           |                                                                   |                         |          |                                                                           |                                                                                                                                                                                                                                      |                                          |                                                                                                                                                             |                                                          | gestational<br>duration, parity.                                                                         |                                                                                                                                        |
| Safari (Iraqi<br>kurdistan,<br>2019) [3] | Case-control<br>study | Healthy<br>pregnant women | 299<br>1. Ramadan fasting:<br>155<br>2.No Ramadan<br>fasting: 144 | 5/27/2017-<br>6/25/2017 | 18 hours | 1. Ramadan<br>fasting: 27.87<br>2. No Ramadan<br>fasting: 27.08<br>(Mean) | 1. Ramadan<br>fasting<br>2.6%<br>Underweight<br>55.3%<br>Normal<br>32.9%<br>Overweight<br>9.2% Obese<br>2. No<br>Ramadan<br>fasting<br>6.3%<br>Underweight<br>58% Normal<br>29.4%<br>Overweight<br>6.3% Obese<br>(Pre-<br>pregnancy) | Fasting vs.<br>Not fasting               | Mode of<br>delivery, GDM,<br>pre-eclampsia,<br>preterm birth,<br>low birth<br>weight, birth<br>height, head<br>circumference,<br>5th minutes<br>APGAR score | 17-29 weeks<br>of gestation<br>(The second<br>trimester) | Age, maternal<br>education,<br>maternal<br>occupation,<br>number of<br>paras, BMI<br>before<br>pregnancy | Fasting during the second<br>trimester of the pregnancy<br>decreased the risk of GDM<br>and excessive weight gain<br>during pregnancy. |
| Engin-Ustun<br>(Turkey,<br>2016) [4]     | Case-control<br>study | Healthy<br>pregnant women | 36<br>1. Fasting $\geq 10$ days:<br>18                            | na                      | Na       | 1. Fasting $\geq 10$<br>days: 29.2<br>2. No Ramadan                       | 1. Fasting $\geq 10$<br>days: 27.7<br>2. No<br>Ramadan                                                                                                                                                                               | Number of<br>fasting days<br>vs. sirtuin | serum sirtuin,<br>visfatin levels,<br>hematological<br>parameter                                                                                            | 13-40 $\uparrow$ weeks<br>of gestation<br>(The second    | BMI, pregnancy<br>weeks, ages                                                                            | A correlation analysis<br>provided a negative<br>correlation between number<br>of fasting days and sirtuin                             |

|                                      |                       |                               |                                                                                                                                                           |            |             |                                                                                                                                                                       |                                                                                                                                                                                          |                                                                                                                               |                                                                                                                                                            |                                                                                |                                                                                                                                                                                                                |                                                                                                                                                                                                                                                                                                             |
|--------------------------------------|-----------------------|-------------------------------|-----------------------------------------------------------------------------------------------------------------------------------------------------------|------------|-------------|-----------------------------------------------------------------------------------------------------------------------------------------------------------------------|------------------------------------------------------------------------------------------------------------------------------------------------------------------------------------------|-------------------------------------------------------------------------------------------------------------------------------|------------------------------------------------------------------------------------------------------------------------------------------------------------|--------------------------------------------------------------------------------|----------------------------------------------------------------------------------------------------------------------------------------------------------------------------------------------------------------|-------------------------------------------------------------------------------------------------------------------------------------------------------------------------------------------------------------------------------------------------------------------------------------------------------------|
|                                      |                       |                               | 2. No Ramadan<br>fasting: 18                                                                                                                              |            |             | fasting: 26.8<br>(Mean)                                                                                                                                               | fasting: 27<br>(Mean)<br>(During<br>pregnancy)                                                                                                                                           | & visfatin<br>levels                                                                                                          |                                                                                                                                                            | & third<br>trimester)                                                          |                                                                                                                                                                                                                | levels and a positive<br>correlation with visfatin<br>levels.                                                                                                                                                                                                                                               |
| AlMogbel<br>(Australia,<br>2022) [5] | Cohort study          | Pregnant<br>women with<br>GDM | 293<br><br>1. Not fasting: 48<br>2. Fasting 12-13 h/d:<br>31<br>3. Fasting 13-14 h/d:<br>85<br>3. Fasting 14-15 h/d:<br>43<br>4. Fasting 15-16 h/d:<br>86 | na         | 12-16 hours | 1. Not fasting:<br>30.8<br>2. Fasting 12-13<br>h/d: 31.6<br>3. Fasting 13-14<br>h/d: 31.6<br>4. Fasting 14-15<br>h/d: 29.9<br>5. Fasting 15-16<br>h/d: 31.4<br>(Mean) | 1. Not fasting:<br>25.2<br>2. Fasting 12-<br>13 h/d: 27.0<br>3. Fasting 13-<br>14 h/d: 26.1<br>4. Fasting 14-<br>15 h/d: 26.7<br>5. Fasting 15-<br>16 h/d: 26.6<br>(Mean)<br>(pregnancy) | 1. Not<br>fasting<br>2. Fasting<br>12-13 h/d<br>3. Fasting<br>13-14 h/d<br>4. Fasting<br>14-15 h/d<br>5. Fasting<br>15-16 h/d | Gestational<br>HTN, weight<br>gain during<br>pregnancy birth<br>weight,<br>hypoglycaemia,<br>hyperbilirubine<br>mia, preterm<br>birth, mode of<br>delivery | 1-40 ↑ weeks<br>of gestation<br>(The first&<br>second &<br>third<br>trimester) | Gestational age<br>at delivery,<br>gender, ethnicity<br>and birthweight<br>centile,<br>gestational age<br>at diagnosis,<br>insulin<br>treatment and<br>birthweight<br>centile, insulin<br>treatment and<br>LGA | No significant effect of<br>Ramadan exposure on mean<br>birthweight, macrosomia and<br>maternal outcomes. But<br>neonatal hypoglycaemia<br>decreased for the fasting<br>period of more than 15 h/d<br>group. and neonatal<br>hyperbilirubinemia increased<br>for the group of fasting more<br>than 21 days. |
| Hossain<br>(India,<br>2021) [6]      | Case-control<br>study | Healthy<br>pregnant women     | 215<br><br>1. Fasting >7 days:<br>123<br>2. No Ramadan<br>fasting: 92                                                                                     | 4/25/2020- | 14-15 hours | 1. Fasting >7<br>days: 26.54<br>2. No Ramadan<br>fasting: 26.84<br>(Mean)                                                                                             | 1. Fasting >7<br>days: 25.44<br>2. No<br>Ramadan<br>fasting: 23.97<br>(Mean)<br>(At start of<br>pregnancy)                                                                               | Fasting >7<br>days<br>vs. Not<br>fasting                                                                                      | Birth weight,<br>birth height,<br>head<br>circumference,<br>1&55th minutes<br>APGAR score                                                                  | (Definition<br>unclear)                                                        | na                                                                                                                                                                                                             | Ramadan fasting did not<br>affect maternal outcomes<br>during pregnancy.                                                                                                                                                                                                                                    |



|                                                       |                              |                           |                                                                     |                         |            |                                                                            |                                                                                                          |                                          |                                                                                                                                  |                                                        |                                     |                                                                                                                                                                                                                                   |
|-------------------------------------------------------|------------------------------|---------------------------|---------------------------------------------------------------------|-------------------------|------------|----------------------------------------------------------------------------|----------------------------------------------------------------------------------------------------------|------------------------------------------|----------------------------------------------------------------------------------------------------------------------------------|--------------------------------------------------------|-------------------------------------|-----------------------------------------------------------------------------------------------------------------------------------------------------------------------------------------------------------------------------------|
| Gul<br>(Pakistan,<br>2018) [7]                        | Case-control<br>study        | Healthy<br>pregnant women | 180<br>1. Fasting >10 days:<br>100<br>2. No Ramadan<br>fasting: 80  | 5/28/2017-<br>6/28/2017 | 15 hours   | 1. Fasting >10<br>days: 27.16<br>2. No Ramadan<br>fasting: 27.36<br>(Mean) | 1. Fasting >10<br>days: 25.31<br>2. No<br>Ramadan<br>fasting: 25.64<br>(Mean)<br>(Definition<br>unclear) | Fasting >10<br>days vs.<br>Not fasting   | Preterm birth,<br>birth weight,<br>birth height,<br>head<br>circumference,<br>mid arm<br>circumference,<br>weight of<br>placenta | 1-40↑ weeks<br>of gestation<br>(Definition<br>unclear) | na                                  | Ramadan fasting did not<br>affect babies' outcomes<br>during pregnancy.                                                                                                                                                           |
| Sakar<br>(Turkey,<br>2016) [8]                        | Case-control<br>study        | Healthy<br>pregnant women | 338<br>1. Ramadan fasting :<br>168<br>2. No Ramadan<br>fasting: 170 | 2013                    | 17.7 hours | 1. Ramadan<br>fasting: 28.04<br>2. No Ramadan<br>fasting: 27.55<br>(Mean)  | 1. Ramadan<br>fasting: 27.91<br>2. No<br>Ramadan<br>fasting: 27.47<br>(Mean)<br>(Definition<br>unclear)  | Fasting<br>vs.<br>Not fasting            | Birth weight,<br>birth height,<br>head<br>circumference,<br>weight of<br>placenta                                                | 25 ↑ weeks of<br>gestation<br>(The third<br>trimester) | na                                  | The mean placental weight in<br>the fasting group was<br>significantly higher. In<br>addition, a significant<br>correlation between placental<br>weight and maternal serum<br>albumin level was observed<br>in the fasting group. |
| Baynouna<br>(United<br>Arab<br>Emirates,<br>2014) [9] | Cross-<br>sectional<br>study | Healthy<br>pregnant women | 150<br>1. Fasting 30 days:<br>76<br>2. No Ramadan<br>fasting: 74    | 2010                    | 14 hours   | 1. Fasting 30<br>days: 28.4<br>2. No Ramadan<br>fasting: 27.5<br>(Mean)    | 1. Fasting 30<br>days: 28.7<br>2. No<br>Ramadan<br>fasting: 28.6<br>(Mean)<br>(Definition<br>unclear)    | Fasting 30<br>days<br>vs.<br>Not fasting | Fasting blood<br>sugar,<br>postprandial<br>blood sugar                                                                           | 20-36 weeks<br>of gestation                            | Age, parity, and<br>gestational age | The mean random blood<br>glucose level after 1 hour of<br>breaking the fast was<br>significantly higher in the<br>fasting group than not fasting<br>group                                                                         |

|                                                         |                       |                               |                                                                                                 |                         |            |                                                                                |    |                                                 |                                                                                                                                                  |                                                                         |    |                                                                                                                                                                                                                                                                                                                                                                                                 |
|---------------------------------------------------------|-----------------------|-------------------------------|-------------------------------------------------------------------------------------------------|-------------------------|------------|--------------------------------------------------------------------------------|----|-------------------------------------------------|--------------------------------------------------------------------------------------------------------------------------------------------------|-------------------------------------------------------------------------|----|-------------------------------------------------------------------------------------------------------------------------------------------------------------------------------------------------------------------------------------------------------------------------------------------------------------------------------------------------------------------------------------------------|
| Sakar<br>(Turkey,<br>2015) [10]                         | Case-control<br>study | Healthy<br>pregnant women     | 106<br>1. Fasting $\geq 15$ days:<br>52<br>2. No Ramadan<br>fasting: 54                         | 7/9/2013-<br>8/7/2013   | 18.3 hours | 1. Fasting $\geq 15$<br>days: 26.8<br>2. No Ramadan<br>fasting: 28.4<br>(Mean) | na | Fasting $\geq 15$<br>days<br>vs.<br>Not fasting | Amniotic fluid<br>index, Doppler<br>flow indices,<br>fetal abdominal<br>circumference,<br>fetal weight<br>gain, weight<br>gain during<br>Ramadan | $\geq 13$ weeks of<br>gestation<br>(The second<br>& third<br>trimester) | na | At the end of the Ramadan,<br><br>increase in biparietal<br><br>diameter, head<br><br>circumference, and femur<br>length showed a statistically<br>significant difference from<br>initial measurements. When<br>fasting and not fasting groups<br>were compared separately, an<br><br>increase in amniotic fluid<br><br>index was statistically<br>significant in the non-fasting<br><br>group. |
| Hassanein<br>(United<br>Arab<br>Emirates,<br>2021) [11] | Cohort study          | Pregnant<br>women with<br>GDM | 25<br>1. Fasting 1-10 days:<br>7<br>2. Fasting 11-20<br>days: 1<br>3. Fasting 21-30<br>days: 17 | 2016                    | na         | 31.8<br>(Mean)                                                                 | na | Pre<br>Ramadan<br>vs. Post<br>Ramadan           | Blood glucose                                                                                                                                    | $\geq 24$ weeks of<br>gestation                                         | na | The average glucose<br>improved significantly, while<br><br>time in target and percent<br>above target numerically<br>improved during Ramadan<br>compared to pre-Ramadan.<br><br>There was significant<br>increment on the number of<br>hypoglycemic events in<br><br>Ramadan.                                                                                                                  |
| Moradi<br>(Iran, 2011)<br>[12]                          | Case-control<br>study | Healthy<br>pregnant women     | 52<br>1. Fasting $\geq 15$ days:<br>25                                                          | 8/21/2009-<br>9/23/2009 | 15.3 hours | 1. Fasting $\geq 15$<br>days: 28.3<br>2. No Ramadan                            | na | Fasting $\geq 15$<br>days                       | Amniotic fluid<br>index, Doppler<br>flow indices,                                                                                                | $\geq 13$ weeks of<br>gestation<br>(The second                          | na | The results showed that<br><br>Ramadan fasting has no<br><br>adverse effect on fetal                                                                                                                                                                                                                                                                                                            |

|                                   |                    |                        |                                                                                                       |                     |                                     |                                                                  |                                                                                        |                                                     |                                                                                                                                |                                                       |    |                                                                                                                                                                     |
|-----------------------------------|--------------------|------------------------|-------------------------------------------------------------------------------------------------------|---------------------|-------------------------------------|------------------------------------------------------------------|----------------------------------------------------------------------------------------|-----------------------------------------------------|--------------------------------------------------------------------------------------------------------------------------------|-------------------------------------------------------|----|---------------------------------------------------------------------------------------------------------------------------------------------------------------------|
|                                   |                    |                        | 2. No Ramadan fasting: 27                                                                             |                     |                                     | fasting: 28.3 (Mean)                                             |                                                                                        | vs. Not fasting                                     | fetal abdominal circumference, fetal weight, fetal length, gain, weight gain during Ramadan                                    | & third trimester)                                    |    | growth, amniotic fluid volume or maternofetal circulation.                                                                                                          |
| Abd-Allah Rezk (Egypt, 2016) [13] | Case-control study | Healthy pregnant women | 450<br>1. Fasting 30 days: 210<br>2. No Ramadan fasting: 240                                          | 6/17/2015-7/16/2015 | 12-16 hours<br>Average: 14.6 hours) | 1. Fasting 30 days: 23.2<br>2. No Ramadan fasting: 23.0 (Mean)   | 1. Fasting 30 days: 25.2<br>2. No Ramadan fasting: 24.8 (Mean)<br>(Definition unclear) | Fasting 30 days vs. Not fasting                     | Birth weight, mode of delivery, amniotic fluid index, Doppler flow indices, 5th minutes APGAR score, risk of admission to NICU | 36-40 weeks of gestation (The third trimester)        | na | Short-term maternal fasting had no deleterious effect on fetal well-being parameters or neonatal outcome.                                                           |
| Makvandi (Iran, 2019) [14]        | Case-control study | Healthy pregnant women | 200<br>1. Ramadan fasting (average 12.6 days): 100<br>2. No Ramadan fasting (Definition unclear): 100 | 2014                | 15.8 hours                          | 1. Ramadan fasting: 26.23<br>2. No Ramadan fasting: 26.27 (Mean) | na                                                                                     | Ramadan fasting (average 12.6 days) vs. Not fasting | Hematological parameter, gestational age at birth, mode of delivery                                                            | ≥13 weeks of gestation (The second & third trimester) | na | This study concluded that partial fasting during Ramadan from a hematological point of view was of no concern for pregnant women 3 months after the end of Ramadan. |

|                                         |                       |                           |                                                                                                          |                         |                         |                                                                                                                   |    |                                                                                                                                                                 |                                                                                                                                                                                                        |                                 |                                                                                                                                                                                                              |                                                                                                                                                                                                                                                                 |
|-----------------------------------------|-----------------------|---------------------------|----------------------------------------------------------------------------------------------------------|-------------------------|-------------------------|-------------------------------------------------------------------------------------------------------------------|----|-----------------------------------------------------------------------------------------------------------------------------------------------------------------|--------------------------------------------------------------------------------------------------------------------------------------------------------------------------------------------------------|---------------------------------|--------------------------------------------------------------------------------------------------------------------------------------------------------------------------------------------------------------|-----------------------------------------------------------------------------------------------------------------------------------------------------------------------------------------------------------------------------------------------------------------|
| Seckin<br>(Turkey,<br>2014) [15]        | Case-control<br>study | Healthy<br>pregnant women | 169<br>1. Fasting $\geq 20$ days:<br>82<br>2. No Ramadan<br>fasting: 87                                  | na                      | 18.7 hours<br>(average) | 1. Fasting $\geq 20$<br>days: 24<br>2. No Ramadan<br>fasting: 26.1<br>(Mean)                                      | na | Fasting $\geq 20$<br>days<br>vs.<br>Not fasting                                                                                                                 | Amniotic fluid<br>index, Doppler<br>flow indices,<br>fetal abdominal<br>circumference,<br>fetal weight<br>fetal length,<br>gain, birth<br>weight, mode of<br>delivery, risk of<br>admission to<br>NICU | $\geq 29$ weeks of<br>gestation | Maternal age,<br>parity, and<br>gestational age.                                                                                                                                                             | Fetal development, Doppler<br>parameters, and neonatal<br>outcomes were not<br>significantly affected in<br>healthy fasting women;<br>however, there was a<br>significant association<br>between fasting and amniotic<br>fluid index.                           |
| Savitri<br>(Netherlands<br>, 2014) [16] | Cohort study          | Pregnant<br>women         | 130<br>1. Fasting $\leq 15$ days:<br>21<br>2. Fasting $> 15$ days:<br>49<br>3. No Ramadan<br>fasting: 60 | 8/11/2010-<br>9/10/2010 | 14 hours                | 1. Fasting $\leq 15$<br>days: 28.9<br>2. Fasting $> 15$<br>days: 28.9<br>3. No Ramadan<br>fasting: 29.3<br>(Mean) | na | 1. Fasting<br>$\leq 15$ days &<br>Fasting $> 15$<br>days vs.<br>Not fasting<br>2. Fasted in<br>first &<br>second &<br>third<br>trimesters<br>vs. Not<br>fasting | Birth weight                                                                                                                                                                                           | $\geq 4$ weeks of<br>gestation  | Maternal<br>smoking status<br>during Ramadan<br>and pregnancy,<br>maternal<br>ethnicity,<br>nulliparity, risk<br>classification at<br>the start of<br>prenatal care<br>and for socio-<br>economic<br>factors | There were no differences in<br>birth weight between<br>newborn whose mothers had<br>or had not fasted if Ramadan<br>fasting had taken place later<br>in pregnancy. Ramadan<br>fasting during early<br>pregnancy may lead to lower<br>birth weight of newborns. |

|                                  |                       |                               |                                                                         |                        |            |                                                                                |                                                                                                              |                                                                                                                            |                                                                                                                                                                                                                              |                                 |                                                  |                                                                                                                                                                                                                   |
|----------------------------------|-----------------------|-------------------------------|-------------------------------------------------------------------------|------------------------|------------|--------------------------------------------------------------------------------|--------------------------------------------------------------------------------------------------------------|----------------------------------------------------------------------------------------------------------------------------|------------------------------------------------------------------------------------------------------------------------------------------------------------------------------------------------------------------------------|---------------------------------|--------------------------------------------------|-------------------------------------------------------------------------------------------------------------------------------------------------------------------------------------------------------------------|
| Awwad<br>(Lebanon,<br>2012) [17] | Cohort study          | Healthy<br>pregnant<br>women. | 402<br>1. Ramadan fasting:<br>201<br>2. No Ramadan<br>fasting: 201      | 9/1/2008-<br>9/30/2008 | 15.1 hours | 1. Ramadan<br>fasting: 29.7<br>2. No Ramadan<br>fasting: 30.0<br>(Mean)        | 1. Ramadan<br>fasting: 24.8<br>2. No<br>Ramadan<br>fasting: 24.3<br>(Mean)<br>(Definition<br>unclear)        | Fasting<br>days<br>vs.<br>Not fasting                                                                                      | Preterm birth,<br>gestational age<br>at birth, birth<br>weight, low<br>birth weight,<br>ketonuria                                                                                                                            | 20-34 weeks<br>of gestation     | Maternal age,<br>gestational age,<br>parity, BMI | Fasting during the month of<br>Ramadan did not seem to<br>increase the baseline risk of<br>preterm delivery in pregnant<br>women regardless of the<br>gestational age during which<br>this practice was observed. |
| Gur<br>(Turkey,<br>2015) [18]    | Cohort study          | Healthy<br>pregnant women     | 156<br>1. Fasting $\geq 15$ days:<br>78<br>2. No Ramadan<br>fasting: 78 | 2012, 2013             | 16 hours   | 1. Fasting $\geq 15$<br>days: 24.2<br>2. No Ramadan<br>fasting: 25.1<br>(Mean) | 1. Fasting $\geq 15$<br>days: 24.5<br>2. No<br>Ramadan<br>fasting: 24.8<br>(Mean)<br>(Definition<br>unclear) | 1. Fasting<br>$\geq 15$ days<br>vs.<br>Not fasting<br>2. Finish<br>day of<br>fasting vs.<br>Fifteenth<br>day of<br>fasting | Gestational age<br>at birth, 5th<br>minutes<br>APGAR score,<br>hematological<br>parameter,<br>amniotic fluid<br>index, biparietal<br>diameter, fetal<br>abdominal<br>circumference,<br>head<br>circumference<br>fetal length | 12-28 weeks<br>of gestation     | Age, parity, and<br>gestational age              | High-density lipoprotein,<br>ferritin significantly<br>increased, and glycated<br>hemoglobin, insulin, and<br>homeostasis model index<br>significantly decreased.                                                 |
| Hizli<br>(Turkey,<br>2012) [19]  | Case-control<br>study | Healthy<br>pregnant women     | 110<br>1. Fasting $\geq 10$ days:<br>56                                 | 8/11/2010-<br>9/9/2010 | 15.3 hours | 1. Fasting $\geq 10$<br>days: 27<br>2. No Ramadan                              | 1. Fasting $\geq 10$<br>days: 25<br>2. No<br>Ramadan                                                         | Fasting $\geq 10$<br>days<br>vs.<br>Not fasting                                                                            | Hematological<br>parameter,<br>ketonuria, mode<br>of delivery,                                                                                                                                                               | $\geq 28$ weeks of<br>gestation | Age, parity, and<br>gestational age              | Fasting of healthy women<br>during pregnancy seemed to<br>have no adverse effects on<br>amniotic fluid index, fetal                                                                                               |

|                                  |                              |                           |                                 |                           |            |                                              |                                                                   |                                                                                                                                                     |                                                                                                                                       |                             |                                     |                                                                                                                                                                                                                                                                                                                  |
|----------------------------------|------------------------------|---------------------------|---------------------------------|---------------------------|------------|----------------------------------------------|-------------------------------------------------------------------|-----------------------------------------------------------------------------------------------------------------------------------------------------|---------------------------------------------------------------------------------------------------------------------------------------|-----------------------------|-------------------------------------|------------------------------------------------------------------------------------------------------------------------------------------------------------------------------------------------------------------------------------------------------------------------------------------------------------------|
|                                  |                              |                           | 2. No Ramadan<br>fasting: 54    |                           |            | fasting: 25.8<br>(Mean)                      | fasting: 27<br>(Definition<br>unclear)<br>(Definition<br>unclear) |                                                                                                                                                     | amniotic fluid<br>index, Doppler<br>flow indices,<br>risk of<br>admission to<br>NICU, birth<br>weight,<br>gestational age<br>at birth |                             |                                     | Doppler and delivery<br>parameters.                                                                                                                                                                                                                                                                              |
| Khoshdel<br>(Iran, 2014)<br>[20] | Cross-<br>sectional<br>study | Healthy<br>pregnant women | 39                              | 2012/7/21-<br>2012/8/18   | 16.5 hours | 26.9<br>(Mean)                               | 25<br>(Mean)<br>(at the<br>beginning of<br>the study)             | The data of<br>fasting first<br>week,<br>second<br>week,<br>fourth<br>week, two<br>weeks after<br>Ramadan<br>were<br>compared<br>with each<br>other | Leptin,<br>neuropeptide Y,<br>insulin level.                                                                                          | 7-35 weeks of<br>gestation  | na                                  | The result of this study<br>revealed the important role of<br>leptin and neuropeptide Y in<br>the long-term regulation of<br>energy balance in pregnant<br>women with chronic diurnal<br>fasting, and it further<br>revealed that Ramadan<br>fasting did not significantly<br>change the serum insulin<br>level. |
| Ozturk<br>(Turkey,<br>2011) [21] | Case-control<br>study        | Healthy<br>pregnant women | 72<br>1. Ramadan fasting:<br>42 | 1-29<br>September<br>2008 | 12 hours   | 1. Ramadan<br>fasting: 30.1<br>2. No Ramadan | na                                                                | Fasting<br>vs.<br>Not fasting                                                                                                                       | Maternal weight<br>gain, birth                                                                                                        | 13-24 weeks<br>of gestation | Age, parity and<br>gestational age. | Maternal fasting during<br>Ramadan in the second<br>trimester did not have a                                                                                                                                                                                                                                     |

|                            |                           |                        |                                                                                                                                                                                                               |                       |            |                      |                                               |                                                                                                                          |                                                 |                                                              |    |                                                                                                                                                                                                                                                                                 |
|----------------------------|---------------------------|------------------------|---------------------------------------------------------------------------------------------------------------------------------------------------------------------------------------------------------------|-----------------------|------------|----------------------|-----------------------------------------------|--------------------------------------------------------------------------------------------------------------------------|-------------------------------------------------|--------------------------------------------------------------|----|---------------------------------------------------------------------------------------------------------------------------------------------------------------------------------------------------------------------------------------------------------------------------------|
|                            |                           |                        | 2. No Ramadan fasting: 30                                                                                                                                                                                     |                       |            | fasting: 29.5 (Mean) |                                               |                                                                                                                          | weight, TAS, TOS, OSI                           | (The second trimester)                                       |    | significant effect on maternal oxidative stress, fetal development or fetal birth weight.                                                                                                                                                                                       |
| Ziaee (Iran, 2010) [22]    | Cohort study              | Healthy pregnant women | 189<br>1. Fasting 1-10 days: 28<br>2. Fasting 11-20 days: 35<br>3. Fasting >20 days: 60<br>&<br>1. First Trimester: 82<br>2. Second Trimester: 56<br>3. Third Trimester: 51<br>&<br>1. No Ramadan fasting: 66 | 10/15/2004-11/13/2004 | 13.6 hours | 25.9 (Mean)          | 23.9 (Mean)                                   | 1. Compare fasting 0, 1-10, 11-20, >20 days with each other &<br>2. Compare first/second/third trimester with each other | Birth weight, birth length, head circumference, | 1-40 ↑ weeks of gestation (The first/second/third trimester) | na | In healthy women with appropriate nutrition, Islamic fasting has no inappropriate effect on intrauterine growth and birth-time indices. Meanwhile, relative risk of low weight birth was 1.5 times in mothers on fasting at first trimester as compared to non-fasting mothers. |
| Khoshdel (Iran, 2014) [20] | Self-control study cohort | Pregnant women         | 30                                                                                                                                                                                                            | 7/20/2012-8/18/2012   | 17.1 hours | 26.9 (Mean)          | 25 (Mean)<br>( at the beginning of the study) | The data of fasting first week, second week, fourth                                                                      | LH, FSH, oestrogen, progesterone and leptin     | (Definition unclear)                                         | na | They found poor weight gain and hypoleptinaemia in pregnant fasted women during the study.                                                                                                                                                                                      |

|                                |              |                |                                                              |                    |          |                                                                |                                                                                                                                                                                      |                                                             |                                               |                                                              |                                                                                                                            |                                                                                   |
|--------------------------------|--------------|----------------|--------------------------------------------------------------|--------------------|----------|----------------------------------------------------------------|--------------------------------------------------------------------------------------------------------------------------------------------------------------------------------------|-------------------------------------------------------------|-----------------------------------------------|--------------------------------------------------------------|----------------------------------------------------------------------------------------------------------------------------|-----------------------------------------------------------------------------------|
|                                |              |                |                                                              |                    |          |                                                                |                                                                                                                                                                                      | week, two weeks after Ramadan were compared with each other |                                               |                                                              |                                                                                                                            |                                                                                   |
| Petherick (England, 2014) [23] | Cohort study | Pregnant women | 300<br>1. Ramadan fasting: 128<br>2. No Ramadan fasting: 172 | 8/11/2010-9/8/2010 | 18 hours | 1. Ramadan fasting: 27.6<br>2. No Ramadan fasting: 29.0 (Mean) | 1. Ramadan fasting 7.8%<br>Underweight 28.9%<br>Normal 24.2%<br>Overweight 29.7% Obese 9.4% Missing<br>2. No Ramadan fasting 5.8%<br>Underweight 40.1%<br>Normal 26.7%<br>Overweight | Fasting vs. Not fasting                                     | Preterm birth, low birth weight, birth weight | 1-40 ↑ weeks of gestation (The first/second/third trimester) | Age, fasting, trimester of exposure to fasting, maternal education, parity, booking BMI, height, baby's gender and smoking | Fasting was not found to be associated with adverse birth outcomes in this study. |



|                               |                    |                        |                                                                                                                                                                                                                          |                     |            |                                                                                                                                                                                                           |                                                                                                                                                                                                           |                                                                                                                                         |                                                                                                                                                                                                              |                                                              |                            |                                                                                                        |
|-------------------------------|--------------------|------------------------|--------------------------------------------------------------------------------------------------------------------------------------------------------------------------------------------------------------------------|---------------------|------------|-----------------------------------------------------------------------------------------------------------------------------------------------------------------------------------------------------------|-----------------------------------------------------------------------------------------------------------------------------------------------------------------------------------------------------------|-----------------------------------------------------------------------------------------------------------------------------------------|--------------------------------------------------------------------------------------------------------------------------------------------------------------------------------------------------------------|--------------------------------------------------------------|----------------------------|--------------------------------------------------------------------------------------------------------|
|                               |                    |                        |                                                                                                                                                                                                                          |                     |            |                                                                                                                                                                                                           | 16.9% Obese<br>10.5%<br>Missing<br>(at booking)                                                                                                                                                           |                                                                                                                                         |                                                                                                                                                                                                              |                                                              |                            |                                                                                                        |
| Kavehmanesh (Iran, 2004) [24] | Cohort study       | Healthy pregnant women | 539<br>1. Fasting ≥10 days: 284<br>2. Fasting <10 days: 255                                                                                                                                                              | na                  | 13 hours   | 1. Fasting ≥10 days: 28<br>2. Fasting <10 days: 27<br>(Mean)                                                                                                                                              | 1. Fasting ≥10 days: 25.9<br>2. Fasting <10 days: 24.2<br>(Mean)                                                                                                                                          | Fasting ≥10 days vs. Fasting <10 days                                                                                                   | Birth weight, birth height                                                                                                                                                                                   | (Definition unclear)                                         | na                         | Maternal fasting during Ramadan did not have a significant effect on the neonatal birth weight         |
| Karateke (Turkey, 2015) [25]  | Case-control study | Healthy pregnant women | 1. First Trimester fasting: 40<br>2. Second Trimester fasting: 40<br>3. Third Trimester fasting: 40<br>&<br>1. First Trimester no fasting: 40<br>2. Second Trimester no fasting: 40<br>3. Third Trimester no fasting: 40 | 6/28/2014-7/27/2014 | 18.1 hours | 1. First Trimester fasting: 24.7<br>2. Second Trimester fasting: 26.5<br>3. Third Trimester fasting: 27.5<br>&<br>1. First Trimester no fasting: 25.3<br>2. Second Trimester no fasting: 27.3<br>3. Third | 1. First Trimester fasting: 21.2<br>2. Second Trimester fasting: 23.1<br>3. Third Trimester fasting: 22.5<br>&<br>1. First Trimester no fasting: 20.8<br>2. Second Trimester no fasting: 22.9<br>3. Third | 1. First Trimester fasting vs. Not fasting<br>2. Second Trimester fasting vs. Not fasting<br>3. Third Trimester fasting vs. Not fasting | Mode of delivery, amniotic fluid index, Doppler flow indices, fetal weight gain, biparietal diameter, femur length, 1 & 5 th minutes APGAR score, risk of admission to NICU, birth weight, low birth weight, | 1-40 ↑ weeks of gestation (The first/second/third trimester) | gestational age at Ramadan | There was no bad fetal outcome between pregnant women with fasting and pregnant women without fasting. |

|                                                        |                              |                               |                                                                   |                         |             |                                                                         |                                                                                                       |                                                  |                                                                                              |                           |                              |                                                                                                                                                                                                                                                                                                                                      |
|--------------------------------------------------------|------------------------------|-------------------------------|-------------------------------------------------------------------|-------------------------|-------------|-------------------------------------------------------------------------|-------------------------------------------------------------------------------------------------------|--------------------------------------------------|----------------------------------------------------------------------------------------------|---------------------------|------------------------------|--------------------------------------------------------------------------------------------------------------------------------------------------------------------------------------------------------------------------------------------------------------------------------------------------------------------------------------|
|                                                        |                              |                               |                                                                   |                         |             | Trimester no<br>fasting: 29.2<br>(Mean)                                 | Trimester no<br>fasting: 21.5                                                                         |                                                  | maternal weight<br>gain                                                                      |                           |                              |                                                                                                                                                                                                                                                                                                                                      |
| Bayoglu<br>Tekin<br>(Turkey,<br>2016) [26]             | Cross-<br>sectional<br>study | Healthy<br>pregnant women     | 48<br>1. Ramadan fasting:<br>23<br>2. No Ramadan<br>fasting: 25   | 2014                    | 17.24 hours | 1. Ramadan<br>fasting: 27.8<br>2. No Ramadan<br>fasting: 30.7<br>(Mean) | 1. Ramadan<br>fasting: 27.3<br>2. No<br>Ramadan<br>fasting: 28.1<br>(Mean)<br>(Definition<br>unclear) | Fasting<br>vs.<br>Not fasting                    | Hematological<br>parameter,<br>Doppler flow<br>indices, mode of<br>delivery, birth<br>weight | >30 weeks of<br>gestation | Age, gestation<br>and parity | Blood urea nitrogen,<br>potassium and hematocrit<br>levels, blood and urine<br>NGAL levels were<br>significantly higher, and fRA<br>Doppler indices increased in<br>fasting women during the<br>second visit in the last week<br>of the Ramadan, while non-<br>fasting women had no<br>significant alterations in each<br>evaluation |
| Mirghani<br>(United<br>Arab<br>Emirates,<br>2004) [27] | Cross-<br>sectional<br>study | Healthy<br>pregnant women     | 63                                                                | na                      | na          | 27.4<br>(Mean)                                                          | na                                                                                                    | Fasting vs.<br>Post-meal                         | Fetal breathing<br>movement                                                                  | >30 weeks of<br>gestation | na                           | Intermittent maternal fasting<br>was associated with a<br>significant alteration in the<br>frequency and pattern of<br>human fetal breathing<br>movement.                                                                                                                                                                            |
| Afandi<br>(United<br>Arab<br>Emirates,<br>2017) [28]   | Cohort study                 | Pregnant<br>women with<br>GDM | 32<br>1. Pre-Ramadan diet<br>(on diet): 10<br>2. Ramadan diet: 13 | 5/27/2017-<br>6/24/2017 | 16.5 hours  | 32.9<br>(Mean)                                                          | 29.5<br>(Mean)<br>(pre-<br>pregnancy)                                                                 | Compare<br>pre-<br>Ramadan<br>diet (on<br>diet), | Blood glucose                                                                                | (Definition<br>unclear)   | na                           | Ramadan fasting in women<br>with GDM treated with diet<br>alone or with diet plus<br>metformin was associated<br>with lower mean glucose                                                                                                                                                                                             |

|                                            |                       |                        |                                                            |                       |            |                                                                   |    |                                                           |                                                                                                          |                        |                                  |                                                                                                                                                                                                                                                                                                                                          |
|--------------------------------------------|-----------------------|------------------------|------------------------------------------------------------|-----------------------|------------|-------------------------------------------------------------------|----|-----------------------------------------------------------|----------------------------------------------------------------------------------------------------------|------------------------|----------------------------------|------------------------------------------------------------------------------------------------------------------------------------------------------------------------------------------------------------------------------------------------------------------------------------------------------------------------------------------|
|                                            |                       |                        | 3. Ramadan diet and metformin: 9                           |                       |            |                                                                   |    | Ramadan diet, Ramadan diet with metformin with each other |                                                                                                          |                        |                                  | levels and higher rates of hypoglycemia when compared with non-fasting glucose levels.                                                                                                                                                                                                                                                   |
| Mirghani (United Arab Emirates, 2005) [29] | Cross-sectional study | Healthy pregnant women | 153<br>1. Ramadan fasting: 78<br>2. No Ramadan fasting: 75 | 10/29/2003-11/23/2003 | 13.9 hours | na                                                                | na | Fasting vs. Not fasting                                   | Fetal heart rate                                                                                         | >30 weeks of gestation | Age, parity and gestational age. | The number of large accelerations in computerized fetal heart tracing was decreased in pregnant women abstaining from food and water.                                                                                                                                                                                                    |
| Malhotra (England, 1989) [30]              | Case-control study    | Pregnant women         | 22<br>1. Ramadan fasting: 11<br>2. No Ramadan fasting: 11  | 4/29/1987-5/28/1987   | 17 hours   | 1. Ramadan fasting: 26.7<br>2. No Ramadan fasting: 26.6<br>(Mean) | na | Fasting vs. Not fasting                                   | Hematological parameter, birth weight, 1&5th minutes APGAR score, head circumference, weight of placenta | 28 weeks of gestation  | Gestation age                    | At the end of the Ramadan fast day there was a significant fall in glucose, insulin, lactate and carnitine, and a rise in triglyceride, non-esterified fatty acid and 3-hydroxybutyrate. When compared with the control group, none of the Ramadan mothers had a completely normal set of biochemical values at the end of the fast day. |

|                                               |                       |                        |                                                                                                                                                                                                                              |                       |            |                                                                                                                                                                                                                                                      |                                                                                                                                                                                                                                                      |                                                                                                                                         |                                                     |                                                              |                                 |                                                                                                              |
|-----------------------------------------------|-----------------------|------------------------|------------------------------------------------------------------------------------------------------------------------------------------------------------------------------------------------------------------------------|-----------------------|------------|------------------------------------------------------------------------------------------------------------------------------------------------------------------------------------------------------------------------------------------------------|------------------------------------------------------------------------------------------------------------------------------------------------------------------------------------------------------------------------------------------------------|-----------------------------------------------------------------------------------------------------------------------------------------|-----------------------------------------------------|--------------------------------------------------------------|---------------------------------|--------------------------------------------------------------------------------------------------------------|
| Mirghani<br>(United Arab Emirates, 2007) [31] | Cross-sectional study | Healthy pregnant women | 106<br>1. Ramadan fasting: 53<br>2. No Ramadan fasting: 53                                                                                                                                                                   | 10/4/2005-11/2/2005   | 14.3 hours | 1. Ramadan fasting: 28.3<br>2. No Ramadan fasting: 26.4<br>(Mean)                                                                                                                                                                                    | na                                                                                                                                                                                                                                                   | Fasting vs. Not fasting                                                                                                                 | Doppler flow induces, blood glucose                 | (Definition unclear)                                         | Age, parity and gestational age | Maternal fasting was not associated with significant changes in the uterine artery Doppler flow velocimetry. |
| Kiziltan<br>(Turkey, 2005) [32]               | Cross-sectional study | Healthy pregnant women | 98<br>1. First Trimester fasting: 12<br>2. Second Trimester fasting: 29<br>3. Third Trimester fasting: 8<br>&<br>1. First Trimester no fasting: 12<br>2. Second Trimester no fasting: 30<br>3. Third Trimester no fasting: 7 | 10/15/2004-11/13/2004 | 12 hours   | 1. First Trimester fasting (1 month): 25.2<br>2. Second Trimester fasting (1 month): 25.1<br>3. Third Trimester fasting (1 month): 22.6<br>&<br>1. First Trimester no fasting: 26.1<br>2. Second Trimester no fasting: 24.9<br>3. Third Trimester no | 1. First Trimester fasting (1 month): 25.9<br>2. Second Trimester fasting (1 month): 26.5<br>3. Third Trimester fasting (1 month): 29.1<br>&<br>1. First Trimester no fasting: 26.3<br>2. Second Trimester no fasting: 27.7<br>3. Third Trimester no | 1. First Trimester fasting vs. Not fasting<br>2. Second Trimester fasting vs. Not fasting<br>3. Third Trimester fasting vs. Not fasting | Hematological parameter, weight gain during Ramadan | 1-40 ↑ weeks of gestation (The first/second/third trimester) | na                              | Ramadan fasting had no significant adverse effect on the health of pregnant women.                           |

|                                 |                              |                                                                                                                                 |                                                                         |                                                        |                             |                                                                                |                                               |                                                             |                                            |                                                              |                                                                                                                                 |                                                                                                                                                                                                 |
|---------------------------------|------------------------------|---------------------------------------------------------------------------------------------------------------------------------|-------------------------------------------------------------------------|--------------------------------------------------------|-----------------------------|--------------------------------------------------------------------------------|-----------------------------------------------|-------------------------------------------------------------|--------------------------------------------|--------------------------------------------------------------|---------------------------------------------------------------------------------------------------------------------------------|-------------------------------------------------------------------------------------------------------------------------------------------------------------------------------------------------|
|                                 |                              |                                                                                                                                 |                                                                         |                                                        |                             | fasting: 23.8<br>(Mean)                                                        | fasting: 29.2<br>(Mean)<br>(During<br>gnancy) |                                                             |                                            |                                                              |                                                                                                                                 |                                                                                                                                                                                                 |
| Khalaf<br>(Egypt,<br>2015) [33] | Cross-<br>sectional<br>study | Healthy<br>pregnant women                                                                                                       | 221<br>1. Ramadan fasting:<br>97<br>2. No Ramadan<br>fasting: 124       | 7/21/2012-<br>8/17/2012<br>&<br>7/12/2013-<br>8/6/2013 | 16.4 hours<br>(10-12 hours) | 29.3<br>(The number of<br>people is error)                                     | na                                            | Fasting<br>vs.<br>Not fasting                               | Amniotic fluid<br>index                    | >36 weeks of<br>gestation                                    | na                                                                                                                              | The fasting in Ramadan has<br>no effect on or may improve<br>the amniotic fluid index in<br>the last month, while<br>gravidity plays a role in the<br>amniotic fluid index in<br>fasting group. |
| Azizi (Iran,<br>2004) [34]      | Cohort study                 | 4-13y children<br>and whose<br>mothers fasted<br>at least 27 days<br>or not fasted in<br>Ramadan during<br>their<br>pregnancies | 190<br>1. Fasting $\geq 27$ days:<br>95<br>2. No Ramadan<br>fasting: 95 | 1988-1997                                              | 13-16 hours                 | Children: 8.6<br>Mothers: 26.5<br>(pregnant)<br>(Mean)                         | na                                            | 1. Fasting<br>$\geq 27$ days<br>2. No<br>Ramadan<br>fasting | Weight, height,<br>BMI for age, IQ         | $\geq 25$ weeks<br>of gestation<br>(The third<br>trimester ) | Father's<br>educational<br>level, residential<br>status, breast-<br>feeding<br>duration, and<br>percentage of<br>Caesarean sect | Fasting during gestation did<br>not adversely affect IQ of<br>children whose mothers had<br>fasted during Ramadan while<br>being pregnant.                                                      |
| Kamyabi<br>(Iran, 2004)<br>[35] | Cross-<br>sectional<br>study | Healthy<br>pregnant women                                                                                                       | 53<br>1. Fasting $\geq 20$ days:<br>25<br>2. No Ramadan<br>fasting: 28  | na                                                     | 12 hours                    | 1. Fasting $\geq 20$<br>days: 25.8<br>2. No Ramadan<br>fasting: 24.4<br>(Mean) | na                                            | 1. Fasting<br>$\geq 20$ days<br>2. No<br>Ramadan<br>fasting | Amniotic fluid<br>index, blood<br>pressure | 20-36 weeks<br>of gestation                                  | na                                                                                                                              | Fasting in Ramadan had no<br>significant effect on the<br>decrease of amniotic fluid<br>index, deepest vertical pocket<br>and amniotic fluid volume.                                            |

|                                      |                              |                                       |                                                                 |                                                                               |            |                                                                         |    |                                                                   |                                                                                                                                                                                                                                |                                               |    |                                                                                                                                                                                                                                                                                 |
|--------------------------------------|------------------------------|---------------------------------------|-----------------------------------------------------------------|-------------------------------------------------------------------------------|------------|-------------------------------------------------------------------------|----|-------------------------------------------------------------------|--------------------------------------------------------------------------------------------------------------------------------------------------------------------------------------------------------------------------------|-----------------------------------------------|----|---------------------------------------------------------------------------------------------------------------------------------------------------------------------------------------------------------------------------------------------------------------------------------|
| Ismail<br>(Malaysia,<br>2011) [36]   | Cohort study                 | Pregnant<br>women with<br>GDM or T2DM | 37<br>1. T2DM: 24<br>2. GDM: 13                                 | 9/14/2007-<br>10/13/2007<br>9/2/2008-<br>10/1/2008<br>8/23/2009-<br>9/20/2009 | 14.4 hours | 1. T2DM: 32.3<br>2. GDM: 31.8<br>(Mean)                                 | na | 1. T2DM<br>vs. GDM<br>2. Onset<br>Ramadan<br>vs. After<br>Ramadan | HbA1c,<br>fructosamine                                                                                                                                                                                                         | Average 25<br>week<br>(Definition<br>unclear) | na | Serum HbA1c reduced in<br>GDM after Ramadan                                                                                                                                                                                                                                     |
| Dikensoy<br>(Turkey,<br>2009) [37]   | Case-control<br>study        | Healthy<br>pregnant women             | 65<br>1. Ramadan fasting:<br>36<br>2. No Ramadan<br>fasting: 29 | 9/23/2006-<br>10/23/2006                                                      | 14.4 hours | 1. Ramadan<br>fasting: 23.4<br>2. No Ramadan<br>fasting: 24.4<br>(Mean) | na | Fasting<br>vs.<br>Not fasting                                     | Hematological<br>parameter,<br>weight gain<br>during<br>Ramadan,<br>amniotic fluid<br>index, Doppler<br>flow indices,<br>fetal weight,<br>fetal biparietal<br>diameter, fetal<br>femur length,<br>fetal biophysical<br>profile | ≥20 weeks of<br>gestation                     | na | The results of this study<br>showed that maternal serum<br>cortisol level was elevated<br>while LDL/HDL ratio was<br>decreased in pregnant<br>women, who were fasting<br>during Ramadan. No<br>untoward effect of Ramadan<br>was observed on intrauterine<br>fetal development. |
| Rakicioğlu<br>(Turkey,<br>2006) [38] | Cross-<br>sectional<br>study | Healthy<br>pregnant women             | 21                                                              | na                                                                            | na         | 27.3<br>(Mean)                                                          | na | During<br>Ramadan<br>fasting vs.<br>After<br>Ramadan<br>fasting   | Breast milk<br>composition                                                                                                                                                                                                     | 2-5 months<br>after labor                     | na | Ramadan fasting had no<br>significant effect on the<br>macronutrient composition of<br>the breast milk and<br>consequently the growth of<br>the infants. There were                                                                                                             |

|                                            |                       |                        |                                                              |                                                                       |            |                                                                   |    |                         |                                                                                                   |                        |                                  |                                                                                                                                                                                                                                                                            |
|--------------------------------------------|-----------------------|------------------------|--------------------------------------------------------------|-----------------------------------------------------------------------|------------|-------------------------------------------------------------------|----|-------------------------|---------------------------------------------------------------------------------------------------|------------------------|----------------------------------|----------------------------------------------------------------------------------------------------------------------------------------------------------------------------------------------------------------------------------------------------------------------------|
|                                            |                       |                        |                                                              |                                                                       |            |                                                                   |    |                         |                                                                                                   |                        |                                  | <p>significant differences in some of the micronutrients such as zinc, magnesium, and potassium. The nutritional status of lactating women was affected by Ramadan fasting.</p> <p>All of the nutrient intakes (except vitamins A, E, and C) decreased during Ramadan.</p> |
| Mirghani (United Arab Emirates, 2006) [39] | Case-control study    | Healthy pregnant women | 324<br>1. Ramadan fasting: 168<br>2. No Ramadan fasting: 156 | 11/6/2002-12/4/2002<br>10/29/2003-11/23/2003<br>10/15/2004-11/13/2004 | 13.9 hours | 28.6                                                              | na | Fasting vs. Not fasting | Blood glucose, hematological parameter, GDM, hypertension, birth weight, gestational age at birth | ≥30 weeks of gestation | Age, parity, and gestational age | Maternal diet restriction was associated with an increased risk of GDM and induction of labor. The frequency of neonatal admission to SCBU was increased.                                                                                                                  |
| Mirghani (United Arab Emirates, 2003) [40] | Cross-sectional study | Healthy pregnant women | 162<br>1. Ramadan fasting: 81<br>2. No Ramadan fasting: 81   | 11/17/2001-12/12/2001                                                 | 13.7 hours | 1. Ramadan fasting: 29.1<br>2. No Ramadan fasting: 28.1<br>(Mean) | na | Fasting vs. Not fasting | Fetal breathing movement                                                                          | ≥30 weeks of gestation | Age, parity, and gestational age | Fetal breathing movement was reduced during maternal fasting.                                                                                                                                                                                                              |

Appearance, Pulse, Grimace, Activity, and Respiration (APGAR); Follicle-stimulating hormone (FSH); Gestational diabetes mellitus (GDM); Hemoglobin A1c (HbA1c); Hypertension (HTN); Intelligence Quotient (IQ); Luteinizing hormone (LH); Neutrophil gelatinase-associated lipocalin (NGAL); Neonatal intensive care unit (NICU); Oxidative stress index (OSI); Type 2 diabetes mellitus (T2DM); Total antioxidant status (TAS); Total oxidant status (TOS); Special Care Baby Unit (SCBU)

## References

1. Parveen, R.; Khakwani, M.; Latif, M.; Tareen, A.U. Maternal and perinatal outcome after ramadan fasting. *Pakistan Journal of Medical Sciences* **2020**, *36*, 894.
2. Savitri, A.I.; Amelia, D.; Painter, R.C.; Baharuddin, M.; Roseboom, T.J.; Grobbee, D.E.; Uiterwaal, C.S. Ramadan during pregnancy and birth weight of newborns. *Journal of nutritional science* **2018**, *7*.
3. Safari, K.; Piro, T.J.; Ahmad, H.M. Perspectives and pregnancy outcomes of maternal Ramadan fasting in the second trimester of pregnancy. *BMC pregnancy and childbirth* **2019**, *19*, 1-10.
4. Engin-Ustun, Y.; Caglayan, E.K.; Kara, M.; Gocmen, A.Y.; Polat, M.F.; Aktulay, A. The effect of Ramadan fasting on sirtuin and visfatin levels. *Interventional Medicine and Applied Science* **2016**, *8*, 14-19.
5. AlMogbel, T.A.; Ross, G.; Wu, T.; Molyneaux, L.; Constantino, M.I.; McGill, M.; Harding, A.J.; Pech, C.; Alrasheed, A.A.; Wong, J. Ramadan and gestational diabetes: maternal and neonatal outcomes. *Acta diabetologica* **2022**, *59*, 21-30.
6. Hossain, N.; Samuel, M.; Mughal, S.; Shafique, K. Ramadan Fasting: Perception and maternal outcomes during Pregnancy. *Pakistan Journal of Medical Sciences* **2021**, *37*, 1262.
7. Gul, Z.; Rajar, S.; Shaikh, Z.F.; Shafique, K.; Hossain, N. Perinatal outcome among fasting and non fasting mothers during the month of Ramadan. *Pakistan Journal of Medical Sciences* **2018**, *34*, 989.
8. Sakar, M.; Balsak, D.; Verit, F.; Zebitay, A.; Buyuk, A.; Akay, E.; Turfan, M.; Demir, S.; Yayla, M. The effect of Ramadan fasting and maternal hypoalbuminaemia on neonatal anthropometric parameters and placental weight. *Journal of Obstetrics and Gynaecology* **2016**, *36*, 483-486.
9. Baynouna Al Ketbi, L.M.; Niglekerke, N.J.; Zein Al Deen, S.M.; Mirghani, H. Diet restriction in Ramadan and the effect of fasting on glucose levels in pregnancy. *BMC research notes* **2014**, *7*, 1-6.
10. Sakar, M.N.; Gultekin, H.; Demir, B.; Bakir, V.L.; Balsak, D.; Vuruskan, E.; Acar, H.; Yucel, O.; Yayla, M. Ramadan fasting and pregnancy: implications for fetal development in summer season. *Journal of Perinatal Medicine* **2015**, *43*, 319-323.
11. Abdelrahim, D.; Faris, M.E.; Hassanein, M.; Shakir, A.Z.; Yusuf, A.M.; Almeneessier, A.S.; BaHammam, A.S. Impact of Ramadan diurnal intermittent fasting on hypoglycemic events in patients with type 2 diabetes: a systematic review of randomized controlled trials and observational studies. *Frontiers in Endocrinology* **2021**, *12*, 624423.
12. Moradi, M. The effect of Ramadan fasting on fetal growth and Doppler indices of pregnancy. *Journal of research in medical sciences: the official journal of Isfahan University of Medical Sciences* **2011**, *16*, 165.



13. Abd-Allah Rezk, M.; Sayyed, T.; Abo-Elnasr, M.; Shawky, M.; Badr, H. Impact of maternal fasting on fetal well-being parameters and fetal–neonatal outcome: a case–control study. *The Journal of Maternal-Fetal & Neonatal Medicine* **2016**, *29*, 2834-2838.
14. Makvandi, S.; Karimi, L.; Mahdavian, M.; Bastami, A. No differences in hematological parameters of fasting and non-fasting pregnant women three months after Ramadan. *International Journal for Vitamin and Nutrition Research* **2019**.
15. Seckin, K.D.; Yeral, M.I.; Karşı, M.F.; Gultekin, I.B. Effect of maternal fasting for religious beliefs on fetal sonographic findings and neonatal outcomes. *International Journal of Gynecology & Obstetrics* **2014**, *126*, 123-125.
16. Savitri, A.I.; Yadegari, N.; Bakker, J.; van Ewijk, R.J.; Grobbee, D.E.; Painter, R.C.; Uiterwaal, C.S.; Roseboom, T.J. Ramadan fasting and newborn's birth weight in pregnant Muslim women in The Netherlands. *British Journal of Nutrition* **2014**, *112*, 1503-1509.
17. Awwad, J.; Usta, I.M.; Succar, J.; Musallam, K.; Ghazeeri, G.; Nassar, A. The effect of maternal fasting during Ramadan on preterm delivery: a prospective cohort study. *BJOG: An International Journal of Obstetrics & Gynaecology* **2012**, *119*, 1379-1386.
18. Gur, E.; Turan, G.; Ince, O.; Karadeniz, M.; Tatar, S.; Kasap, E.; Sahin, N.; Guclu, S. Effect of Ramadan fasting on metabolic markers, dietary intake and abdominal fat distribution in pregnancy. *Hippokratia* **2015**, *19*, 298.
19. Hızlı, D.; Yılmaz, S.S.; Onaran, Y.; Kafalı, H.; Danişman, N.; Mollamahmutoğlu, L. Impact of maternal fasting during Ramadan on fetal Doppler parameters, maternal lipid levels and neonatal outcomes. *The Journal of Maternal-Fetal & Neonatal Medicine* **2012**, *25*, 975-977.
20. Khoshdel, A.; Kheiri, S.; Hashemi-Dehkordi, E.; Nasiri, J.; Shabanian-Borujeni, S.; Saedi, E. The effect of Ramadan fasting on LH, FSH, oestrogen, progesterone and leptin in pregnant women. *Journal of Obstetrics and Gynaecology* **2014**, *34*, 634-638.
21. Ozturk, E.; Balat, O.; Ugur, M.G.; Yazıcıoğlu, C.; Pence, S.; Erel, Ö.; Kul, S. Effect of Ramadan fasting on maternal oxidative stress during the second trimester: a preliminary study. *Journal of Obstetrics and Gynaecology Research* **2011**, *37*, 729-733.
22. Ziaee, V.; Kihanidoost, Z.; Younesian, M.; Akhavirad, M.-B.; Bateni, F.; Kazemianfar, Z.; Hantoushzadeh, S. The effect of Ramadan fasting on outcome of pregnancy. *Iranian Journal of Pediatrics* **2010**, *20*, 181.
23. Petherick, E.S.; Tuffnell, D.; Wright, J. Experiences and outcomes of maternal Ramadan fasting during pregnancy: results from a sub-cohort of the Born in Bradford birth cohort study. *BMC pregnancy and childbirth* **2014**, *14*, 1-9.
24. Kavehmanesh, Z.; Abolghasemi, H. Maternal Ramadan fasting and neonatal health. *Journal of perinatology* **2004**, *24*, 748-750.
25. Karateke, A.; Kaplanoglu, M.; Avci, F.; Kurt, R.K.; Baloglu, A. The effect of Ramadan fasting on fetal development. *Pakistan journal of medical sciences* **2015**, *31*, 1295.
26. Bayoglu Tekin, Y.; Guvendag Guven, E.S.; Mete Ural, U.; Yazici, Z.A.; Kirbas, A.; Kir Sahin, F. Evaluation of the effects of fasting associated

- dehydration on maternal NGAL levels and fetal renal artery Doppler parameters. *The Journal of Maternal-Fetal & Neonatal Medicine* **2016**, 29, 629-632.
27. Mirghani, H.; Weerasinghe, S.; Smith, J.; Ezimokhai, M. The effect of intermittent maternal fasting on human fetal breathing movements. *Journal of Obstetrics and gynaecology* **2004**, 24, 635-637.
28. Afandi, B.O.; Hassanein, M.M.; Majd, L.M.; Nagelkerke, N.J. Impact of Ramadan fasting on glucose levels in women with gestational diabetes mellitus treated with diet alone or diet plus metformin: a continuous glucose monitoring study. *BMJ Open Diabetes Research and Care* **2017**, 5, e000470.
29. Mirghani, H.M.; Weerasinghe, S.; Al-Awar, S.; Abdulla, L.; Ezimokhai, M. The effect of intermittent maternal fasting on computerized fetal heart tracing. *Journal of perinatology* **2005**, 25, 90-92.
30. Malhotra, A.; Scott, P.; Scott, J.; Gee, H.; Wharton, B. Metabolic changes in Asian Muslim pregnant mothers observing the Ramadan fast in Britain. *British Journal of Nutrition* **1989**, 61, 663-672.
31. Mirghani, H.M.; Salem, M.; Weerasinghe, S.D. Effect of maternal fasting on uterine arterial blood flow. *Journal of Obstetrics and Gynaecology Research* **2007**, 33, 151-154.
32. Kiziltan, G.; Karabudak, E.; Tuncay, G.; Avsar, F.; Tuncay, P.; Mungan, O.; Meral, P. Dietary intake and nutritional status of Turkish pregnant women during Ramadan. *Saudi medical journal* **2005**, 26, 1782-1787.
33. Khalaf, M.; Tammam, A.E.; Ibrahim, I.; Habib, D.M.; Abdallah, M.S.; Bahlol, M.; Khairy, M.; El Saman, A.M. Effect of Ramadan fasting on amniotic fluid index in last month of pregnancy. *Middle East Fertility Society Journal* **2015**, 20, 54-56.
34. Azizi; Sadeghipour; Siahkollah; Rezaei-Ghaleh. Intellectual development of children born of mothers who fasted in Ramadan during pregnancy. *International journal for vitamin and nutrition research* **2004**, 74, 374-380.
35. Kamyabi, Z.; Naderi, T. The effect of Ramadan fasting on amniotic fluid volume. *Saudi medical journal* **2004**, 25, 45-46.
36. Ismail, N.A.M.; Raji, H.O.; Abd Wahab, N.; Mustafa, N.; Kamaruddin, N.A.; Jamil, M.A. Glycemic control among pregnant diabetic women on insulin who fasted during Ramadan. *Iranian journal of medical sciences* **2011**, 36, 254.
37. Dikensoy, E.; Balat, O.; Cebesoy, B.; Ozkur, A.; Cicek, H.; Can, G. The effect of Ramadan fasting on maternal serum lipids, cortisol levels and fetal development. *Archives of gynecology and obstetrics* **2009**, 279, 119-123.
38. Rakicioğlu, N.; Samur, G.; Topcu, A.; Topcu, A.A. The effect of Ramadan on maternal nutrition and composition of breast milk. *Pediatrics international* **2006**, 48, 278-283.
39. Mirghani, H.M.; Hamud, O.A. The effect of maternal diet restriction on pregnancy outcome. *American journal of perinatology* **2006**, 23, 021-024.
40. Mirghani, H.; Weerasinghe, D.; Ezimokhai, M.; Smith, J. The effect of maternal fasting on the fetal biophysical profile. *International Journal of Gynecology*

*& Obstetrics* **2003**, *81*, 17-21.
